# Supplementary material for: Defects in muscle branched-chain amino acid oxidation contribute to impaired lipid metabolism
Source: PubMed Central journal article supplement — Mol Metab. 2016 Aug 6;5(10):926–36. doi: 10.1016/j.molmet.2016.08.001 (PMC5034611; doi:10.1016/j.molmet.2016.08.001), 2016-08-06
Supplement: mmc1.pdf [file mmc1.pdf]

## Supplemental Figures

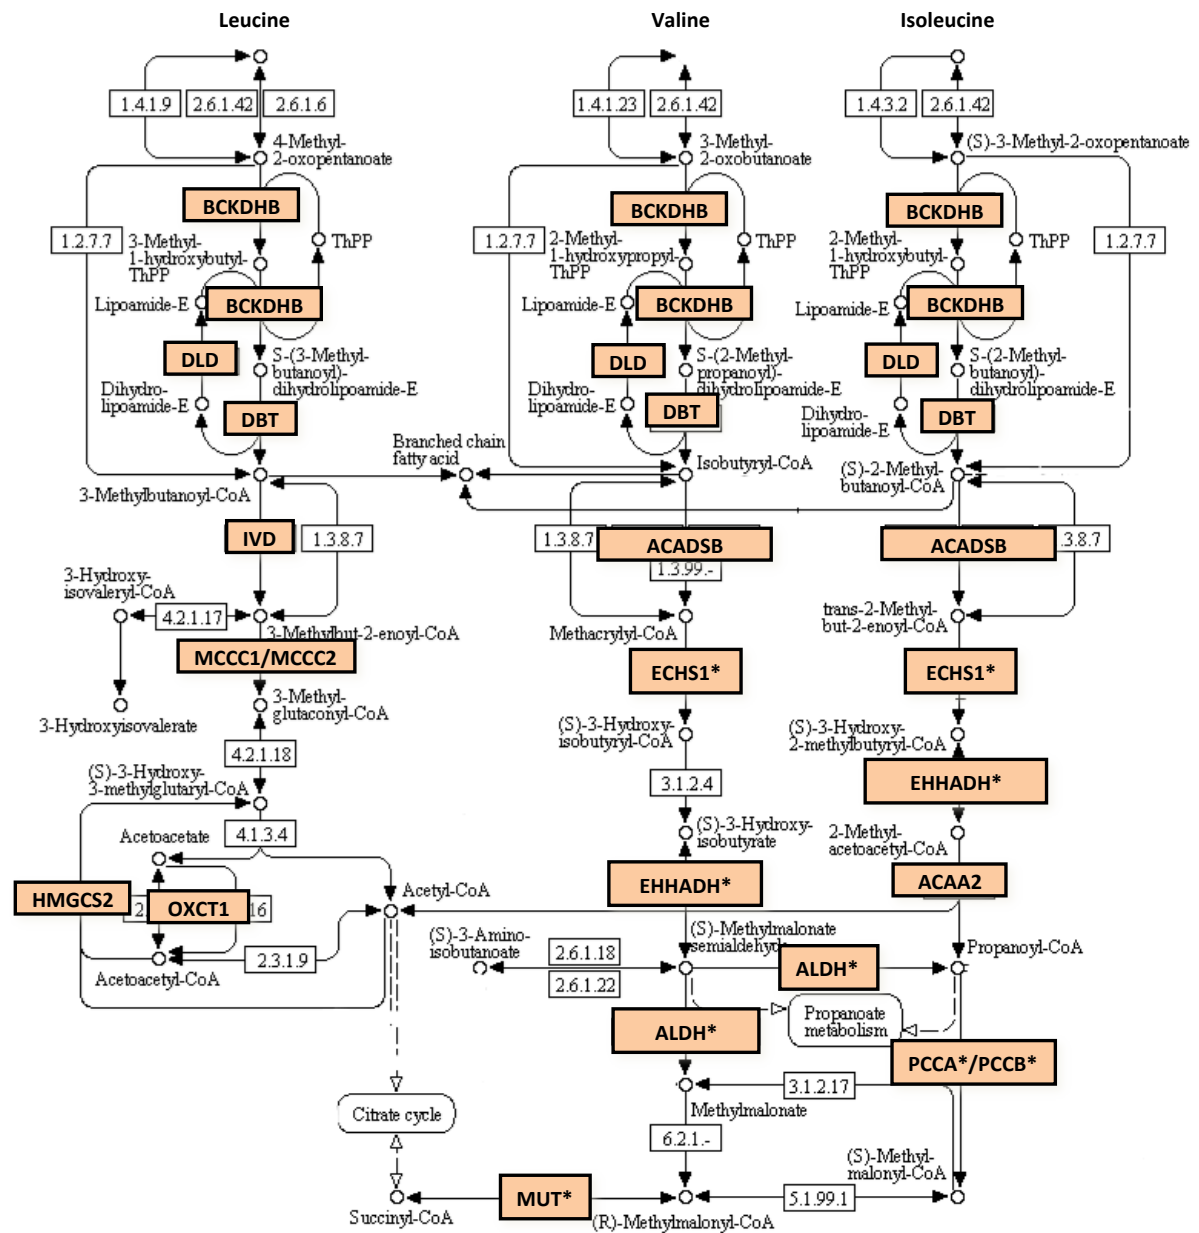

**Figure S1. Insulin resistance is associated with a general downregulation of the BCAA degradation pathway.** GSEA identified the BCAA degradation pathway as downregulated with insulin resistance; proximal, middle, and distal genes in the pathway contributed to the phenotype (orange boxes). \* indicates genes that also contributed to downregulation of the Propanoate Metabolism Pathway. Adapted from KEGG Pathway (<http://www.genome.jp/kegg/pathway.html>).

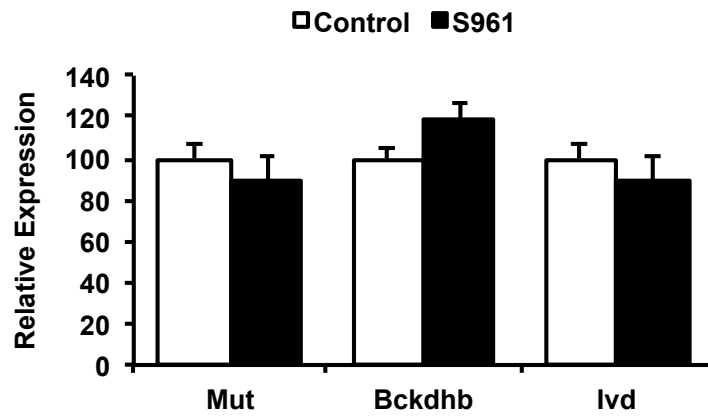

**Figure S2. Muscle BCAA gene expression is not decreased in mice made insulin resistant by S961-infusion.** C57BL/6J mice were treated with 10 nmol S961 for 1 week, and mRNA levels in gastrocnemius muscle were analyzed by RT-PCR (n=5). Data are mean  $\pm$  SEM.

**A**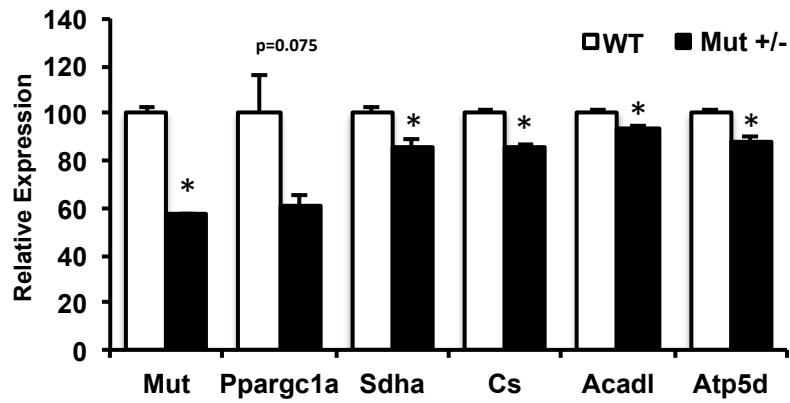**B**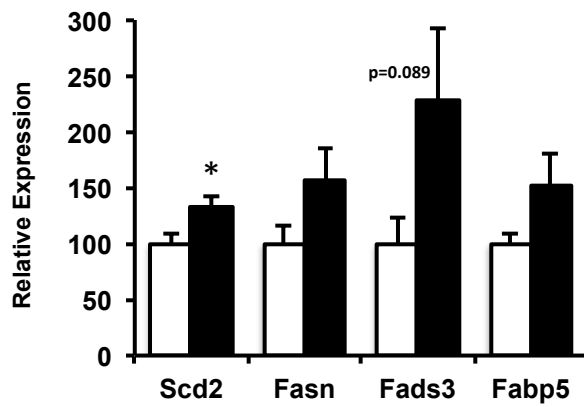

**Figure S3. *Mut*<sup>+/-</sup> mice show differential muscle gene expression patterns.** Gene expression from skeletal muscle of wild type (Wt, white bars) and *Mut*<sup>+/-</sup> mice (black bars) was determined by microarray analysis (n=5); genes involved in fatty acid oxidation (**A**) and lipid synthesis (**B**) are shown. Data are expressed relative to the mean of the Wt group. \*, p<0.05 (t-test).

## BCAA Levels

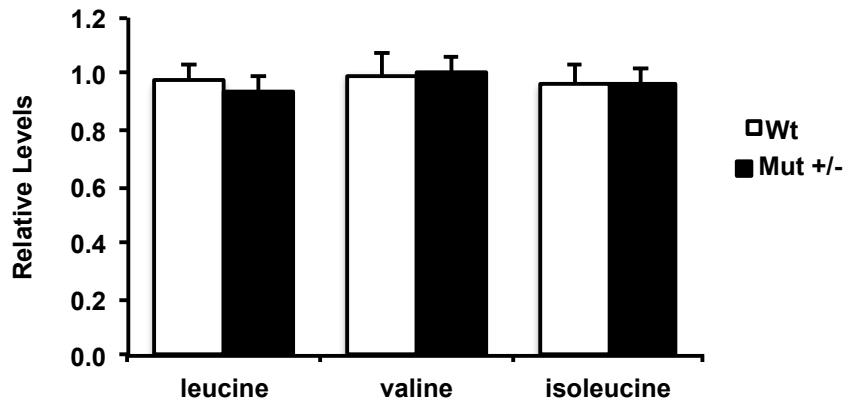

**Figure S4. Muscle branched-chain amino acid levels in the *Mut*<sup>+/-</sup> mice.** Relative levels in skeletal muscle of wild-type (white bars, n=8) and *Mut*<sup>+/-</sup> mice (black bars, n=8). Data are mean  $\pm$  SEM.

## Supplemental Tables

| PATHWAY NAME                     | p-val | FDR q-val |
|----------------------------------|-------|-----------|
| Classic Pathway                  | 0     | 0.08      |
| Radiation Sensitivity            | 0     | 0.11      |
| Complement Pathway               | 0     | 0.13      |
| Complement Activation Classical  | 0     | 0.14      |
| Cytotoxic T-Lymphocyte Pathway   | 0     | 0.15      |
| Glycolysis Pathway               | 0.02  | 0.15      |
| B-Cell Pathway                   | 0.03  | 0.16      |
| B Lymphocyte Pathway             | 0     | 0.16      |
| GPCR Class A Rhodopsin-Like 2    | 0     | 0.16      |
| Antigen-Dependent B-Cell Pathway | 0     | 0.17      |
| T-Cell Apoptosis Pathway         | 0     | 0.20      |
| St Type I Interferon Pathway     | 0.02  | 0.23      |
| Lectin Pathway                   | 0     | 0.23      |
| CR Cytoskeleton                  | 0     | 0.23      |

**Table S1.** Pathways inversely correlated with insulin sensitivity ( $\log S_I$ ), identified using gene set enrichment analysis (GSEA). Pathways showing an FDR  $q < 0.25$  are shown.

| Probe ID     | Gene Symbol | Correlation Coefficient | Correlation p val |
|--------------|-------------|-------------------------|-------------------|
| 202960_s_at  | MUT         | 0.53                    | 0.0001            |
| 221588_x_at  | ALDH6A1     | 0.44                    | 0.0014            |
| 205355_at    | ACADSB      | 0.40                    | 0.0047            |
| 231919_at    | DBT         | 0.38                    | 0.0061            |
| 213321_at    | BCKDHB      | 0.35                    | 0.0136            |
| 230426_at    | DLD         | 0.33                    | 0.0193            |
| 204290_s_at  | ALDH6A1     | 0.33                    | 0.0196            |
| 205371_s_at  | DBT         | 0.33                    | 0.0217            |
| 209095_at    | DLD         | 0.32                    | 0.0230            |
| 216958_s_at  | IVD         | 0.31                    | 0.0279            |
| 221590_s_at  | ALDH6A1     | 0.30                    | 0.0342            |
| 205222_at    | EHHADH      | 0.30                    | 0.0343            |
| 218440_at    | MCCC1       | 0.30                    | 0.0349            |
| 1559239_s_at | ACAT1       | 0.29                    | 0.0425            |
| 221589_s_at  | ALDH6A1     | 0.28                    | 0.0513            |
| 226030_at    | ACADSB      | 0.28                    | 0.0548            |
| 212694_s_at  | PCCB        | 0.28                    | 0.0554            |
| 202054_s_at  | ALDH3A2     | 0.27                    | 0.0563            |
| 202959_at    | MUT         | 0.27                    | 0.0587            |
| 210544_s_at  | ALDH3A2     | 0.26                    | 0.0734            |

**Table S2.** Values for coefficients of correlation of expression of BCAA metabolism genes with log S<sub>i</sub>. Probes with a correlation coefficient greater than 0.25 are shown.

|                                 | <b>Insulin Sensitive</b> | <b>Insulin Resistant</b> |
|---------------------------------|--------------------------|--------------------------|
| <b>Subjects</b>                 | n = 10                   | n = 13                   |
| <b>Age (years)</b>              | 36.3 ± 3.2               | 40.5 ± 3.2               |
| <b>Females</b>                  | 7 (70%)                  | 7 (54%)                  |
| <b>BMI (kg/m<sup>2</sup>)</b>   | 24.7 ± 1.4               | 29.7 ± 1.3 <sup>a</sup>  |
| <b>Fasting Glucose (mmol/l)</b> | 4.92 ± 0.11              | 5.23 ± 0.13              |
| <b>Fasting Insulin (pmol/l)</b> | 30.0 ± 3.6               | 70.8 ± 9.6 <sup>c</sup>  |
| <b>Triglycerides (mmol/l)</b>   | 0.69 ± 0.12              | 1.18 ± 0.10 <sup>b</sup> |
| <b>Cholesterol (mmol/l)</b>     | 1.92 ± 0.13              | 1.97 ± 0.08              |
| <b>HDL-Cholesterol (mmol/l)</b> | 0.64 ± 0.04              | 0.49 ± 0.04              |
| <b>LDL-Cholesterol (mmol/l)</b> | 1.08 ± 0.18              | 1.35 ± 0.08              |
| <b>S<sub>I</sub> (IVGTT)</b>    | 7.60 ± 0.61              | 2.50 ± 0.36 <sup>d</sup> |
| <b>M (mg/kg/min)</b>            | 8.24 ± 0.68              | 6.11 ± 0.50 <sup>a</sup> |

**Table S3.** Clinical characteristics of the subset of participants for which skeletal muscle metabolomic analysis was performed (due to availability of adequate muscle biopsy material in these individuals). Participants were categorized as insulin sensitive or resistant based on S<sub>I</sub> values above or below the median value of 4.78 for a larger population of normoglycemic individuals at the Joslin Diabetes Center. M, glucose metabolism rate. Data are mean ± S.E. a, p<0.05 b, p<0.01 c, p<0.005 d, p<0.001

| Metabolite                     | Spearman $\rho$ | p val |
|--------------------------------|-----------------|-------|
| X - 13424                      | 0.70            | 0.011 |
| X - 13465                      | 0.69            | 0.007 |
| X - 12984                      | 0.66            | 0.004 |
| X - 11437                      | 0.66            | 0.003 |
| X - 13227                      | 0.66            | 0.014 |
| N-acetylmethionine             | 0.65            | 0.032 |
| fumarate                       | 0.63            | 0.002 |
| X - 4795                       | 0.62            | 0.030 |
| 7-beta-hydroxycholesterol      | 0.61            | 0.015 |
| asparagine                     | 0.60            | 0.003 |
| X - 13470                      | 0.60            | 0.029 |
| X - 11859                      | 0.58            | 0.019 |
| X - 5215                       | 0.57            | 0.011 |
| cholesterol                    | 0.57            | 0.007 |
| X - 13463                      | 0.55            | 0.042 |
| squalene                       | 0.54            | 0.039 |
| X - 13093                      | 0.50            | 0.020 |
| alpha-ketoglutarate            | 0.49            | 0.046 |
| 4-methyl-2-oxopentanoate (KIC) | 0.49            | 0.025 |
| X - 10419                      | 0.49            | 0.022 |
| stachydrine                    | 0.48            | 0.022 |
| 3-methyl-2-oxovalerate (KMV)   | 0.48            | 0.044 |
| pantothenate                   | 0.44            | 0.034 |
| X - 12422                      | 0.44            | 0.046 |
| choline                        | 0.44            | 0.048 |
| nicotinamide                   | -0.45           | 0.045 |
| isoleucine                     | -0.53           | 0.013 |
| X - 13450                      | -0.90           | 0.037 |

**Table S4.** Spearman correlation of individual metabolite levels with  $\log S_1$ . Metabolites with correlation p val < 0.05 are shown.



**Data File S1.** Metabolite levels in IS and IR subjects.

See Excel Spreadsheet.
